# Supplementary material for: Epidemiological comparison of the first and second waves of the COVID-19 pandemic in Nigeria, February 2020–April 2021
Source: HighWire-hosted journal article supplement (doi:10.1136/bmjgh-2021-007076), 2021-11-01
Supplement: bmjgh-2021-007076supp002_data_supplement.pdf [file bmjgh-2021-007076supp002_data_supplement.pdf]

**Supplementary File 2: Distribution of sociodemographic and clinical characteristics of the study population in relation to deaths from COVID-19 infection in Nigeria, 27 February—3 April, 2021**

| Variable                                  | First wave                    |                      | Second wave                   |                    | First and second waves         |                      |                             |
|-------------------------------------------|-------------------------------|----------------------|-------------------------------|--------------------|--------------------------------|----------------------|-----------------------------|
|                                           | Survivor<br>[n=61,092<br>(%)] | Dead<br>[n=1,221 (%) | Survivor<br>[n=85,649<br>(%)] | Dead<br>[n=611 (%) | Survivor<br>[n=146,741<br>(%)] | Dead<br>[n=1,832 (%) | Total<br>[n=148,573<br>(%)] |
| <b>Sociodemographic characteristics</b>   |                               |                      |                               |                    |                                |                      |                             |
| <b>Mean (SD) age, year</b><br>[n=784,239] | 37.28 (15.05)                 | 56.93 (16.27)        | 37.53 (16.22)                 | 60.72 (17.42)      | 37.43 (15.75)                  | 58.20 (16.75)        | 37.63 (15.88)               |
| <b>Age group, year</b>                    |                               |                      |                               |                    |                                |                      |                             |
| 0-4                                       | 845 (1.38)                    | 2 (0.16)             | 1,348 (1.57)                  | 5 (0.82)           | 2,193 (1.49)                   | 7 (0.38)             | 2,200 (1.48)                |
| 5-13                                      | 2,274 (3.72)                  | 9 (0.74)             | 3,388 (3.96)                  | 4 (0.65)           | 5,662 (3.86)                   | 13 (0.71)            | 5,675 (3.82)                |
| 14-20                                     | 3,732 (6.11)                  | 17 (1.39)            | 6,229 (7.27)                  | 11 (1.80)          | 9,961 (6.79)                   | 28 (1.53)            | 9,989 (6.72)                |
| 21-30                                     | 12,722 (20.82)                | 56 (4.59)            | 19,133 (22.34)                | 13 (2.13)          | 31,855 (21.71)                 | 69 (3.77)            | 31,924 (21.49)              |
| 31-40                                     | 16,717 (27.36)                | 106 (8.68)           | 20,404 (23.82)                | 42 (6.87)          | 37,121 (25.30)                 | 148 (8.08)           | 37,269 (25.08)              |
| 41-50                                     | 11,547 (18.90)                | 167 (13.68)          | 15,135 (17.67)                | 59 (9.66)          | 26,682 (18.18)                 | 226 (12.34)          | 26,908 (18.11)              |
| 51-60                                     | 6,964 (11.40)                 | 276 (22.60)          | 10,084 (11.77)                | 127 (20.79)        | 17,048 (11.62)                 | 403 (22.00)          | 17,451 (11.75)              |

|                                   |                |             |                |             |                |               |                |
|-----------------------------------|----------------|-------------|----------------|-------------|----------------|---------------|----------------|
| 61-70                             | 2,632 (4.31)   | 298 (24.41) | 4,723 (5.51)   | 142 (23.24) | 7,355 (5.01)   | 440 (24.02)   | 7,795 (5.25)   |
| 71-80                             | 923 (1.51)     | 161 (13.19) | 1,928 (2.25)   | 123 (20.13) | 2,851 (1.94)   | 284 (15.50)   | 3,135 (2.11)   |
| >80                               | 285 (0.47)     | 57 (4.67)   | 649 (0.76)     | 52 (8.51)   | 934 (0.64)     | 109 (5.95)    | 1,043 (0.70)   |
| Missing                           | 2,451 (4.01)   | 72 (5.90)   | 2,628 (3.07)   | 33 (5.40)   | 5,079 (3.46)   | 105 (5.73)    | 5,184 (3.49)   |
| <b>Sex</b>                        |                |             |                |             |                |               |                |
| Female                            | 22,077 (36.14) | 301 (24.65) | 36,066 (42.11) | 204 (33.39) | 58,143 (39.62) | 505 (27.57)   | 58,648 (39.47) |
| Male                              | 38,277 (62.65) | 911 (74.61) | 49,150 (57.39) | 407 (66.61) | 87,427 (59.58) | 1,318 (71.94) | 88,745 (59.73) |
| Missing                           | 738 (1.21)     | 9 (0.74)    | 433 (0.51)     | 0 (0.00)    | 1,171 (0.80)   | 9 (0.49)      | 1,180 (0.79)   |
| <b>Residential setting</b>        |                |             |                |             |                |               |                |
| Rural                             | 3,697 (6.05)   | 78 (6.39)   | 5,086 (5.94)   | 28 (4.58)   | 8,783 (5.99)   | 106 (5.79)    | 8,889 (5.98)   |
| Urban                             | 24,695 (40.42) | 556 (45.54) | 25,934 (30.28) | 314 (51.39) | 50,629 (34.50) | 870 (47.49)   | 51,499 (34.66) |
| Missing                           | 32,700 (53.53) | 587 (48.08) | 54,629 (63.78) | 269 (44.03) | 87,329 (59.51) | 856 (46.72)   | 88,185 (59.35) |
| <b>Formal education completed</b> |                |             |                |             |                |               |                |
| None                              | 894 (1.46)     | 20 (1.64)   | 893 (1.04)     | 7 (1.15)    | 1,787 (1.22)   | 27 (1.47)     | 1,814 (1.22)   |
| Nursery                           | 176 (0.29)     | 0 (0.00)    | 118 (0.14)     | 0 (0.00)    | 294 (0.20)     | 0 (0.00)      | 294 (0.20)     |
| Primary                           | 1,149 (1.88)   | 22 (1.80)   | 1,252 (1.46)   | 2 (0.33)    | 2,401 (1.64)   | 24 (1.31)     | 2,425 (1.63)   |
| Secondary                         | 5,442 (8.91)   | 142 (11.63) | 4,678 (5.46)   | 44 (7.20)   | 10,120 (6.90)  | 186 (10.15)   | 10,306 (6.94)  |

|                                      |                |             |                |             |                |               |                |
|--------------------------------------|----------------|-------------|----------------|-------------|----------------|---------------|----------------|
| Tertiary                             | 15,229 (24.93) | 299 (24.49) | 17,743 (20.72) | 194 (31.75) | 32,972 (22.47) | 493 (26.91)   | 33,465 (22.52) |
| Alternative (e.g. Almajiranci)       | 3,001 (4.91)   | 41 (3.36)   | 1,790 (2.09)   | 8 (1.31)    | 4,791 (3.26)   | 49 (2.67)     | 4,840 (3.26)   |
| Missing                              | 35,201 (57.62) | 697 (57.08) | 59,175 (69.09) | 356 (58.27) | 94,376 (64.31) | 1,053 (57.48) | 95,429 (64.23) |
| <b>Current occupation</b>            |                |             |                |             |                |               |                |
| Pupil/student                        | 4,325 (7.08)   | 12 (0.98)   | 4,725 (5.52)   | 1 (0.16)    | 9,050 (6.17)   | 13 (0.71)     | 9,063 (6.10)   |
| Housewife/child                      | 1,052 (1.72)   | 23 (1.88)   | 1,350 (1.58)   | 6 (0.98)    | 2,402 (1.64)   | 29 (1.58)     | 2,431 (1.64)   |
| Trader/business                      | 2,586 (4.23)   | 103 (8.44)  | 2,271 (2.65)   | 30 (4.91)   | 4,857 (3.31)   | 133 (7.26)    | 4,990 (3.36)   |
| Farmer/miner                         | 660 (1.08)     | 52 (4.26)   | 977 (1.14)     | 18 (2.95)   | 1,637 (1.12)   | 70 (3.82)     | 1,707 (1.15)   |
| Healthcare worker                    | 4,823 (7.89)   | 50 (4.10)   | 2,585 (3.02)   | 15 (2.45)   | 7,408 (5.05)   | 65 (3.55)     | 7,473 (5.03)   |
| Animal-related work                  | 66 (0.11)      | 3 (0.25)    | 54 (0.06)      | 1 (0.16)    | 120 (0.08)     | 4 (0.22)      | 124 (0.08)     |
| Transporter                          | 133 (0.22)     | 6 (0.49)    | 48 (0.06)      | 0 (0.00)    | 181 (0.12)     | 6 (0.33)      | 187 (0.13)     |
| Religious leader                     | 119 (0.19)     | 7 (0.57)    | 94 (0.11)      | 1 (0.16)    | 213 (0.15)     | 8 (0.44)      | 221 (0.15)     |
| Traditional leader                   | 19 (0.03)      | 3 (0.25)    | 35 (0.04)      | 1 (0.16)    | 54 (0.04)      | 4 (0.22)      | 58 (0.04)      |
| Other                                | 23,301 (38.14) | 451 (36.94) | 47,052 (54.94) | 237 (38.79) | 70,353 (47.94) | 688 (37.55)   | 71,041 (47.82) |
| Missing                              | 24,008 (39.30) | 511 (41.85) | 26,458 (30.89) | 301 (49.26) | 50,466 (34.39) | 812 (44.32)   | 51,278 (34.51) |
| <b>Admission to treatment centre</b> |                |             |                |             |                |               |                |
| No                                   | 29,696 (48.61) | 504 (41.28) | 48,435 (56.55) | 194 (31.75) | 78,131 (53.24) | 698 (38.10)   | 78,829 (53.06) |

|                                  |                 |              |                 |              |                 |                |                 |
|----------------------------------|-----------------|--------------|-----------------|--------------|-----------------|----------------|-----------------|
| Yes                              | 6,436 (10.53)   | 352 (28.83)  | 1,109 (1.29)    | 115 (18.82)  | 7,545 (5.14)    | 467 (25.49)    | 8,012 (5.39)    |
| Missing                          | 24,960 (40.86)  | 365 (29.89)  | 36,42.15)       | 302 (49.43)  | 61,065 (41.61)  | 667 (36.41)    | 61,732 (41.55)  |
| <b>Mean (SD) temperature, °C</b> | 36.64 (0.93)    | 37.14 (1.13) | 36.44 (1.23)    | 37.03 (1.32) | 36.55 (1.08)    | 37.11 (1.18)   | 36.58 (1.08)    |
| <b>[n=21,567]</b>                |                 |              |                 |              |                 |                |                 |
| <b>Symptomatic status</b>        |                 |              |                 |              |                 |                |                 |
| Asymptomatic                     | 45,852 (75.05)  | 482 (39.48)  | 68,279 (79.72)  | 274 (44.84)  | 114,131 (77.78) | 756 (41.27)    | 114,887 (77.33) |
| Symptomatic                      | 15,240 (24.95)  | 739 (60.52)  | 17,370 (20.28)  | 337 (55.16)  | 32,610 (22.22)  | 1,076 (58.73)  | 33,686 (22.67)  |
| <b>Clinical characteristics‡</b> |                 |              |                 |              |                 |                |                 |
|                                  | <i>n=15,240</i> | <i>n=739</i> | <i>n=17,370</i> | <i>n=337</i> | <i>n=32,478</i> | <i>n=1,076</i> | <i>N=33,686</i> |
| <b>Abdominal pain</b>            |                 |              |                 |              |                 |                |                 |
| No                               | 14,917 (97.88)  | 710 (96.08)  | 13,787 (79.37)  | 326 (96.74)  | 28,704 (88.02)  | 1,036 (96.28)  | 29,740 (88.29)  |
| Yes                              | 119 (0.78)      | 16 (2.17)    | 309 (1.78)      | 0 (0.00)     | 428 (1.31)      | 16 (1.49)      | 444 (1.32)      |
| Missing                          | 204 (1.34)      | 13 (1.76)    | 3,274 (18.85)   | 11 (3.26)    | 3,478 (10.67)   | 24 (2.23)      | 3,502 (10.40)   |
| <b>Chest pain</b>                |                 |              |                 |              |                 |                |                 |
| No                               | 14,550 (95.47)  | 681 (92.15)  | 16,240 (93.49)  | 306 (90.80)  | 30,790 (94.42)  | 987 (91.73)    | 31,777 (94.33)  |
| Yes                              | 494 (1.29)      | 46 (6.22)    | 815 (4.69)      | 25 (7.42)    | 1,309 (4.01)    | 71 96.60)      | 1,380 (4.10)    |
| Missing                          | 196 (1.29)      | 12 (1.62)    | 315 (1.81)      | 6 (1.780)    | 511 (1.57)      | 18 (1.67)      | 529 (1.57)      |

|                                |                |             |                |             |                |               |                |
|--------------------------------|----------------|-------------|----------------|-------------|----------------|---------------|----------------|
| <b>Chills/sweat</b>            |                |             |                |             |                |               |                |
| No                             | 14,835 (97.34) | 710 (96.08) | 13,648 (78.57) | 326 (96.74) | 28,483 (87.34) | 1,036 (96.28) | 29,519 (87.63) |
| Yes                            | 205 (1.35)     | 17 (2.30)   | 164 (0.94)     | 2 (0.59)    | 369 (1.13)     | 19 (1.77)     | 388 (1.15)     |
| Missing                        | 200 (1.31)     | 12 (1.62)   | 3,558 (20.48)  | 9 (2.67)    | 3,758 (11.52)  | 21 (1.95)     | 3,779 (11.22)  |
| <b>Cough</b>                   |                |             |                |             |                |               |                |
| No                             | 7,530 (49.41)  | 243 (32.88) | 9,485 (54.61)  | 146 (43.32) | 17,015 (52.18) | 389 (36.15)   | 17,404 (51.67) |
| Yes                            | 7,645 (50.16)  | 488 (66.04) | 7,729 (44.50)  | 189 (56.08) | 15,374 (47.15) | 677 (62.92)   | 16,051 (47.65) |
| Missing                        | 65 (0.43)      | 8 (1.08)    | 156 (0.90)     | 2 (0.59)    | 221 (0.680)    | 10 (0.93)     | 231 (0.69)     |
| <b>Diarrhoea</b>               |                |             |                |             |                |               |                |
| No                             | 14,162 (92.93) | 667 (90.26) | 16,179 (93.14) | 313 (92.88) | 30,341 (93.04) | 980 (91.08)   | 31,321 (92.98) |
| Yes                            | 935 (6.14)     | 60 (8.12)   | 788 (4.54)     | 16 (4.75)   | 1,723 (5.28)   | 76 (7.06)     | 1,799 (5.34)   |
| Missing                        | 143 (0.94)     | 12 (1.62)   | 403 (2.32)     | 8 (2.37)    | 546 (1.67)     | 20 (1.86)     | 566 (1.68)     |
| <b>Difficulty in breathing</b> |                |             |                |             |                |               |                |
| No                             | 13,030 (85.50) | 370 (50.07) | 13,376 (77.01) | 190 (56.38) | 26,406 (80.98) | 560 (52.04)   | 26,966 (80.05) |
| Yes                            | 2,063 (13.54)  | 360 (48.71) | 2,858 (16.45)  | 142 (42.14) | 4,921 (15.09)  | 502 (46.65)   | 5,423 (16.10)  |
| Missing                        | 147 (0.96)     | 9 (1.220)   | 1,136 (6.54)   | 5 (1.48)    | 1,283 (3.93)   | 14 (1.30)     | 1,297 (3.85)   |
| <b>Fatigue</b>                 |                |             |                |             |                |               |                |

|                   |                |              |                |             |                |               |                |
|-------------------|----------------|--------------|----------------|-------------|----------------|---------------|----------------|
| No                | 14,117 (92.63) | 653 (88.36)  | 13,151 (75.71) | 298 (88.43) | 27,268 (83.62) | 951 (88.38)   | 28,219 (83.77) |
| Yes               | 914 (6.00)     | 75 (10.15)   | 2,837 (16.33)  | 33 (9.79)   | 3,751 (11.50)  | 108 (10.04)   | 3,859 (11.46)  |
| Missing           | 209 (1.37)     | 11 (1.49)    | 1,382 (7.96)   | 6 (1.78)    | 1,591 (4.880)  | 17 (1.58)     | 1,608 (4.770)  |
| <b>Fever</b>      |                |              |                |             |                |               |                |
| No                | 8,128 (53.33)  | 294 (39.78)  | 10,476 (60.31) | 182 (54.01) | 18,604 (57.05) | 476 (44.24)   | 19,080 (56.64) |
| Yes               | 7,054 (46.29)  | 436 (59.000) | 6,698 (38.56)  | 154 (45.70) | 13,752 (42.17) | 590 (54.83)   | 14,342 (42.58) |
| Missing           | 58 (0.38)      | 9 (1.22)     | 196 (1.13)     | 1 (0.30)    | 254 (0.78)     | 10 (0.93)     | 264 (0.78)     |
| <b>Headache</b>   |                |              |                |             |                |               |                |
| No                | 12,945 (84.94) | 644 (87.14)  | 12,489 (71.90) | 294 (87.24) | 25,434 (77.99) | 938 (87.17)   | 26,372 (78.29) |
| Yes               | 2,153 (14.13)  | 80 (10.83)   | 4,660 (26.83)  | 41 (12.17)  | 6,813 (20.89)  | 121 (11.25)   | 6,934 (20.58)  |
| Missing           | 142 (0.93)     | 15 (2.03)    | 221 (1.27)     | 2 (0.59)    | 363 (1.11)     | 17 (1.58)     | 380 (1.13)     |
| <b>Joint pain</b> |                |              |                |             |                |               |                |
| No                | 14,864 (97.53) | 714 (96.62)  | 15,844 (91.21) | 326 (96.74) | 30,708 (94.17) | 1,040 (96.65) | 31,748 (94.25) |
| Yes               | 164 (1.080)    | 11 (1.49)    | 446 (2.57)     | 2 (0.59)    | 610 (1.87)     | 13 (1.21)     | 623 (1.85)     |
| Missing           | 212 (1.39)     | 14 (1.89)    | 1,080 (6.22)   | 9 (2.67)    | 1,292 (3.96)   | 23 (2.14)     | 1,315 (3.90)   |
| <b>Malaise</b>    |                |              |                |             |                |               |                |
| No                | 1,972 (12.94)  | 114 (15.43)  | 5,163 (29.72)  | 42 (12.46)  | 7,135 (21.88)  | 156 (14.50)   | 7,291 (21.64)  |

|                        |                |             |                |             |                |               |                |
|------------------------|----------------|-------------|----------------|-------------|----------------|---------------|----------------|
| Yes                    | 84 (0.55)      | 11 (1.49)   | 124 (0.71)     | 0 (0.00)    | 208 (0.64)     | 11 (1.02)     | 219 (0.65)     |
| Missing                | 13,184 (86.51) | 614 (83.09) | 12,083 (69.56) | 295 (87.54) | 25,267 (77.48) | 909 (84.48)   | 26,176 (77.71) |
| <b>Muscle pain</b>     |                |             |                |             |                |               |                |
| No                     | 14,742 (96.73) | 704 (95.26) | 15,799 (90.96) | 315 (93.47) | 30,541 (93.66) | 1,019 (94.70) | 31,560 (93.69) |
| Yes                    | 287 (1.88)     | 21 (2.84)   | 532 (3.06)     | 14 (4.15)   | 819 (2.51)     | 35 (3.25)     | 854 (2.54)     |
| Missing                | 211 (1.38)     | 14 (1.89)   | 1,039 (5.98)   | 8 (2.37)    | 1,250 (3.83)   | 22 (2.04)     | 1,272 (3.78)   |
| <b>Nausea</b>          |                |             |                |             |                |               |                |
| No                     | 13,927 (91.38) | 678 (91.75) | 15,847 (91.23) | 314 (93.18) | 29,774 (91.30) | 992 (92.19)   | 30,766 (91.33) |
| Yes                    | 1,152 (7.56)   | 48 (6.50)   | 1,228 (7.07)   | 15 (4.45)   | 2,380 (7.30)   | 63 (5.86)     | 2,443 (7.25)   |
| Missing                | 161 (1.06)     | 13 (1.76)   | 295 (1.70)     | 8 (2.37)    | 456 (1.40)     | 21 (1.95)     | 477 (1.42)     |
| <b>Rapid breathing</b> |                |             |                |             |                |               |                |
| No                     | 13,879 (91.07) | 600 (81.19) | 13,245 (76.25) | 315 (93.47) | 27,124 (83.18) | 915 (85.04)   | 28,039 (83.24) |
| Yes                    | 203 (1.33)     | 57 (7.71)   | 124 (0.71)     | 16 (4.75)   | 327 (1.00)     | 73 (6.78)     | 400 (1.19)     |
| Missing                | 1,158 (7.60)   | 82 (11.10)  | 4,001 (23.03)  | 6 (1.78)    | 5,159 (15.82)  | 88 (8.18)     | 5,247 (15.58)  |
| <b>Runny nose</b>      |                |             |                |             |                |               |                |
| No                     | 10,843 (71.15) | 615 (83.22) | 10,208 (58.77) | 252 (74.78) | 21,051 (64.55) | 867 (80.58)   | 21,918 (65.07) |
| Yes                    | 4,247 (27.87)  | 112 (15.16) | 6,945 (39.98)  | 80 (23.74)  | 11,192 (34.32) | 192 (17.84)   | 11,384 (33.79) |

|                      |                |             |                |             |                |             |                |
|----------------------|----------------|-------------|----------------|-------------|----------------|-------------|----------------|
| Missing              | 150 (0.98)     | 12 (1.62)   | 217 (1.25)     | 5 (1.48)    | 367 (1.13)     | 17 (1.580)  | 384 (1.14)     |
| <b>Sore throat</b>   |                |             |                |             |                |             |                |
| No                   | 11,517 (75.57) | 611 (82.68) | 14,697 (84.61) | 281 (83.38) | 26,214 (80.39) | 892 (82.90) | 27,106 (80.47) |
| Yes                  | 3,608 (23.67)  | 120 (16.24) | 2,424 (13.96)  | 50 (14.84)  | 6,032 (18.50)  | 170 (15.80) | 6,202 (18.41)  |
| Missing              | 115 (0.75)     | 8 (1.08)    | 249 (1.43)     | 6 (1.78)    | 364 (1.12)     | 14 (1.30)   | 378 (1.12)     |
| <b>Vomiting</b>      |                |             |                |             |                |             |                |
| No                   | 14,366 (94.27) | 659 (89.17) | 14,682 (84.53) | 314 (93.18) | 29,048 (89.08) | 973 (90.43) | 30,021 (89.12) |
| Yes                  | 721 (4.73)     | 69 (9.34)   | 656 (3.78)     | 16 (4.75)   | 1,377 (4.22)   | 85 (7.90)   | 1,462 (4.34)   |
| Missing              | 153 (1.00)     | 11 (1.49)   | 2,032 (11.70)  | 7 (2.08)    | 2,185 (6.70)   | 18 (1.67)   | 2,203 (6.54)   |
| <b>Loss of smell</b> |                |             |                |             |                |             |                |
| No                   | 12,491 (81.96) | 627 (84.84) | 13,958 (80.36) | 309 (91.69) | 26,449 (81.11) | 936 (86.99) | 27,385 (81.29) |
| Yes                  | 1,775 (11.65)  | 29 (3.92)   | 3,129 (18.01)  | 19 (5.64)   | 4,904 (15.04)  | 48 (4.46)   | 4,952 (14.70)  |
| Missing              | 974 (6.39)     | 83 (11.23)  | 283 (1.63)     | 9 (2.67)    | 1,257 (3.85)   | 92 (8.55)   | 1,349 (4.00)   |
| <b>Loss of taste</b> |                |             |                |             |                |             |                |
| No                   | 12,736 (83.57) | 620 (83.90) | 15,553 (89.54) | 310 (91.99) | 28,289 (86.75) | 930 (86.43) | 29,219 (86.74) |
| Yes                  | 1,528 (10.03)  | 38 (5.14)   | 1,536 (8.84)   | 18 (5.34)   | 3,064 (9.40)   | 56 (5.20)   | 3,120 (9.26)   |
| Missing              | 976 (6.40)     | 81 (10.96)  | 281 (1.62)     | 9 (2.67)    | 1,257 (3.85)   | 90 (8.36)   | 1,347 (4.00)   |



|                                  |                |             |                |             |                |               |                |
|----------------------------------|----------------|-------------|----------------|-------------|----------------|---------------|----------------|
| <b>ARDS</b>                      |                |             |                |             |                |               |                |
| No                               | 14,935 (98.00) | 680 (92.02) | 13,328 (76.73) | 313 (92.88) | 28,263 (86.67) | 993 (92.29)   | 29,256 (86.85) |
| Yes                              | 99 (0.65)      | 48 (6.50)   | 48 (0.28)      | 16 (4.75)   | 147 (0.45)     | 64 (5.95)     | 211 (0.63)     |
| Missing                          | 206 (1.35)     | 11 (1.49)   | 3,994 (22.99)  | 8 (2.37)    | 4,200 (12.88)  | 19 (1.77)     | 4,219 (12.52)  |
| <b>Pneumonia</b>                 |                |             |                |             |                |               |                |
| No                               | 14,973 (98.25) | 710 (96.08) | 13,264 (76.36) | 308 (91.64) | 28,237 (86.59) | 1,018 (94.61) | 29,255 (86.85) |
| Yes                              | 28 (0.18)      | 17 (2.30)   | 11 (0.06)      | 19 (5.64)   | 39 (0.12)      | 36 (3.35)     | 75 (0.22)      |
| Missing                          | 239 (1.57)     | 12 (1.62)   | 4,095 (23.58)  | 10 (2.97)   | 4,334 (13.29)  | 22 (2.04)     | 4,356 (12.93)  |
| ‡: 35,185 symptomatic cases only |                |             |                |             |                |               |                |
